# Supplementary material for: Nutrient removal from stormwater in floating treatment wetlands: prediction of kinetic rates, effect of initial concentration and plant performance assessment
Source: Royal Society of Chemistry journal article supplement (doi:10.1039/d2ew00402j), 2022-01-01
Supplement: d2ew00402j1.pdf [file d2ew00402j1.pdf]

## Supplementary information

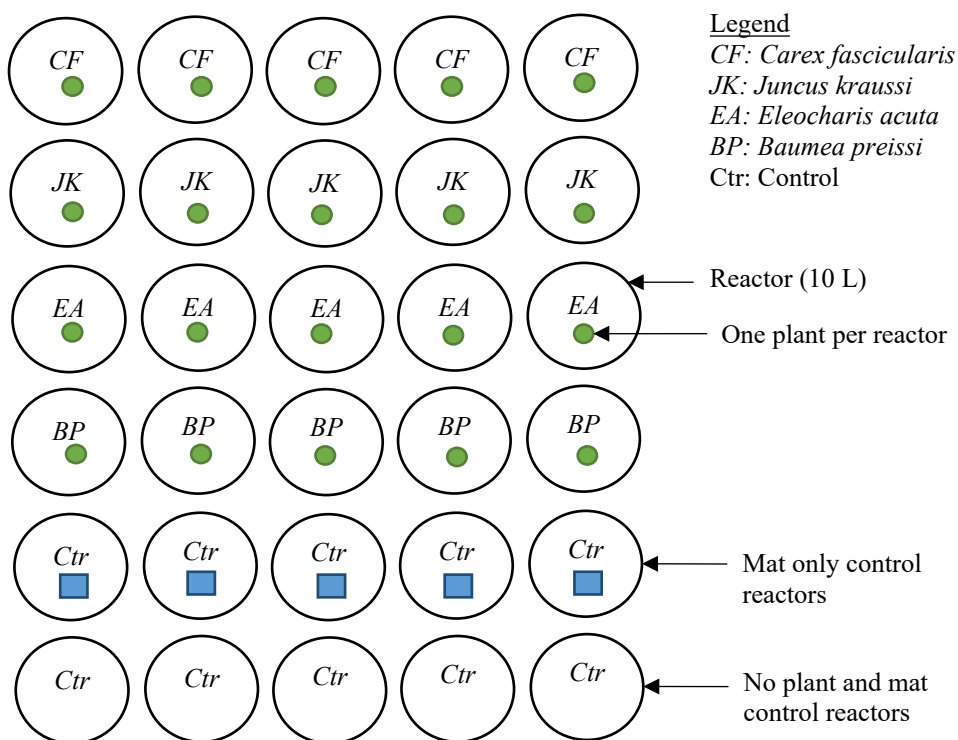

Figure S1: Schematic of experimental setup of Experiment 1

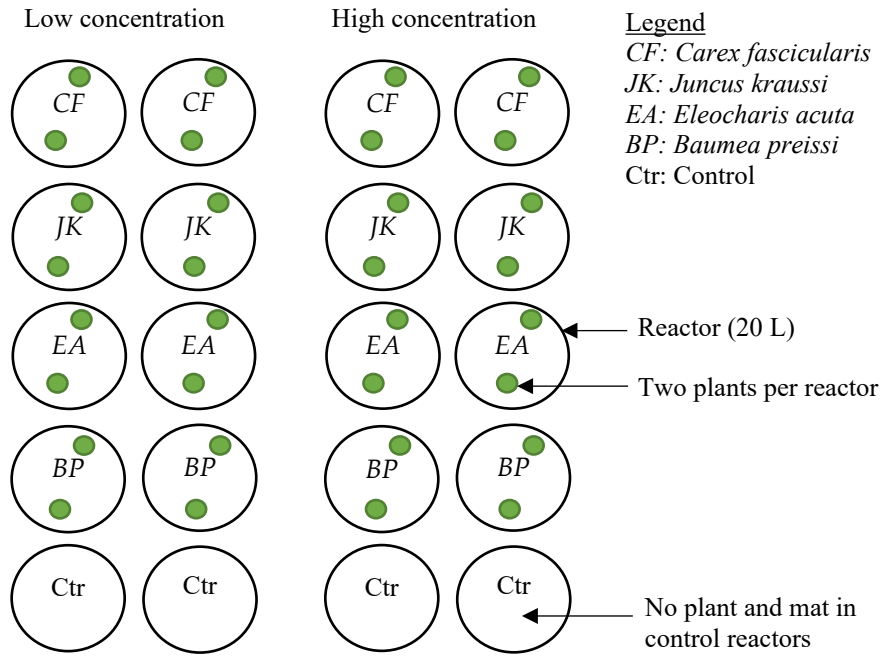

Figure S2: Schematic of experimental setup of Experiment 2

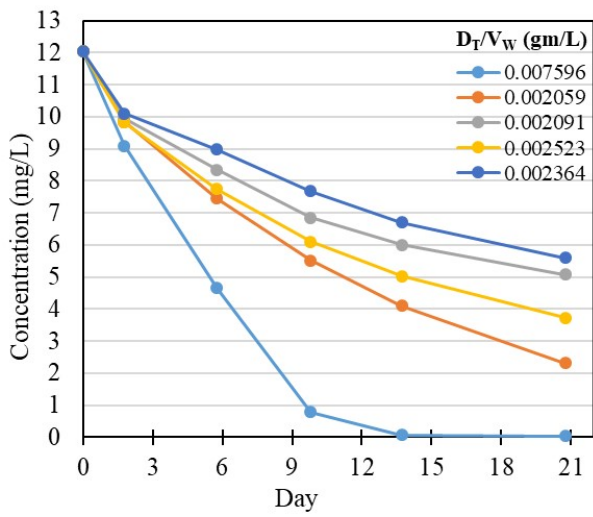

(a)

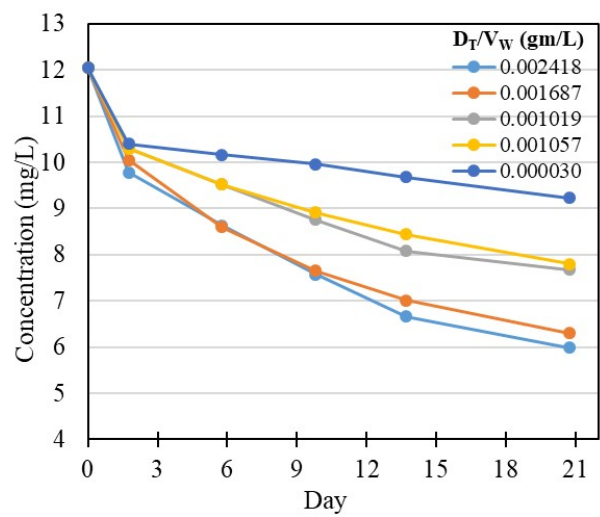

(b)

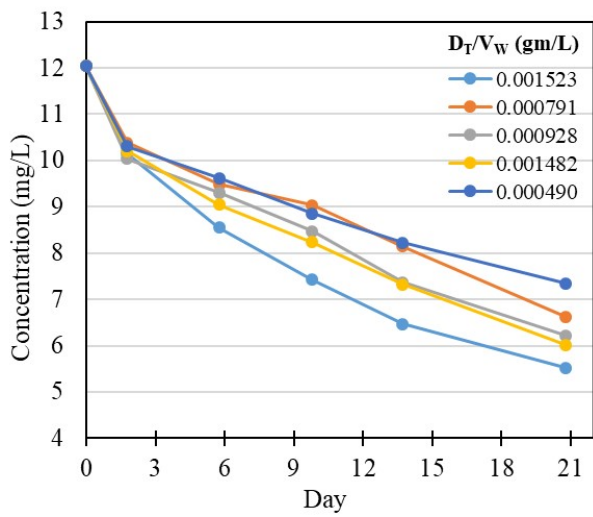

(c)

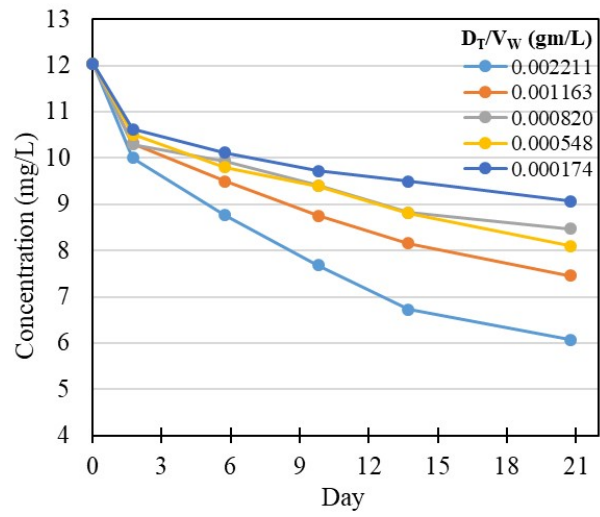

(d)

Figure S3: Changes in TN concentration over time in Experiment 1. (a) *Carex fascicularis* (b) *Juncus kraussii* (c) *Eleocharis acuta* (d) *Baumea preissii*.

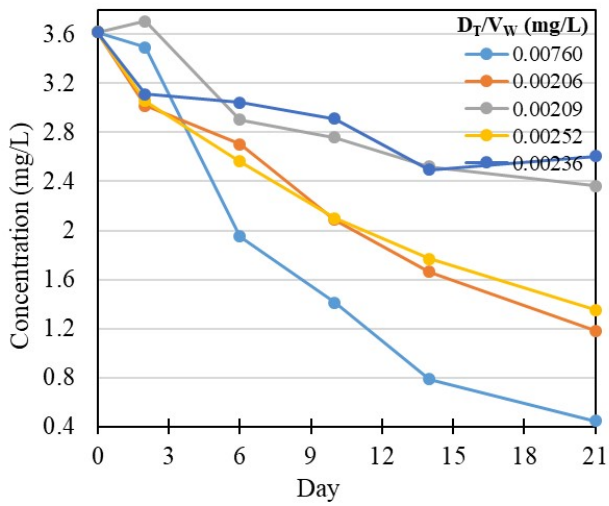

(a)

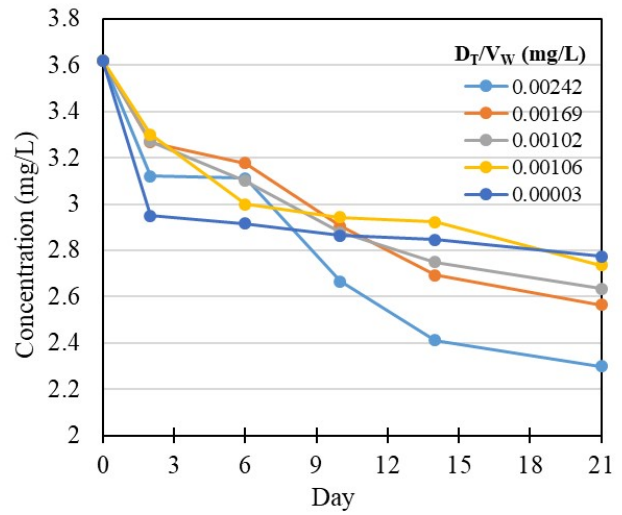

(b)

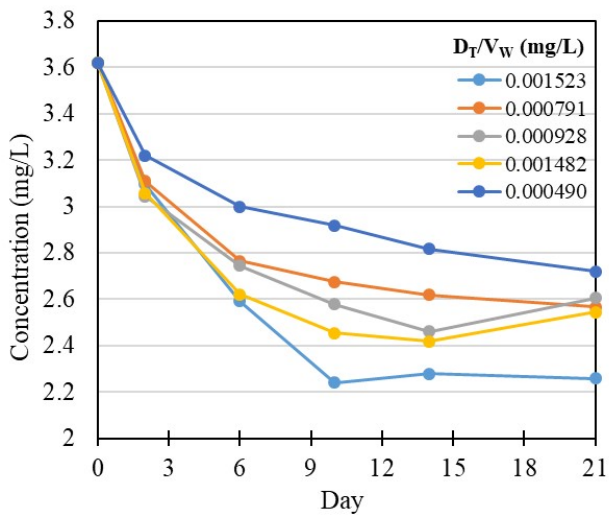

(c)

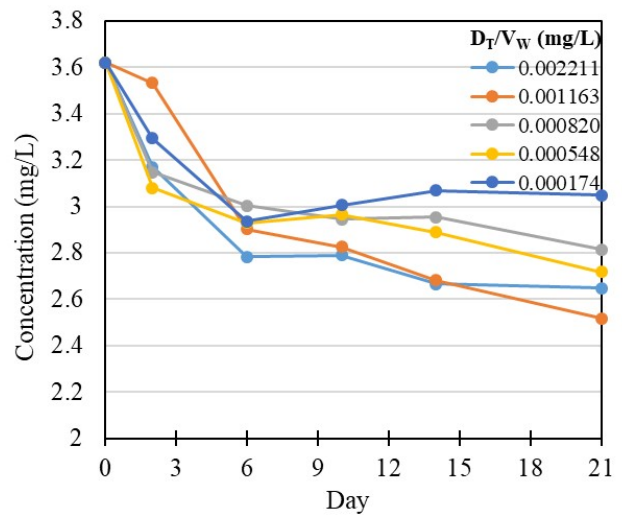

(d)

Figure S4: Changes in TP concentration over time in Experiment 1. (a) *Carex fascicularis* (b) *Juncus kraussii* (c) *Eleocharis acuta* (d) *Baumea preissii*.

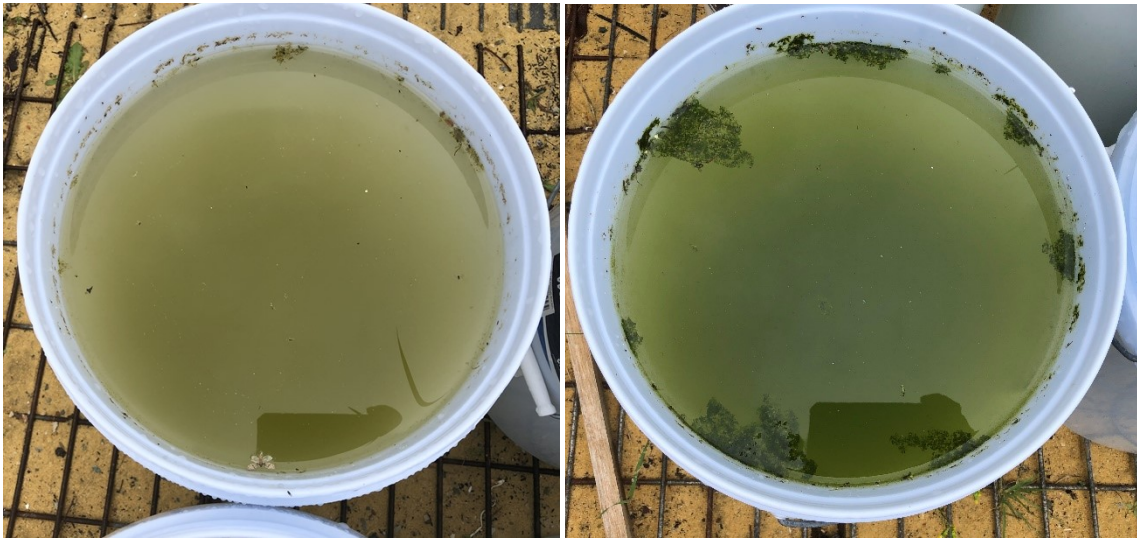

(a)

(b)

Figure S5: Algal growth in the control reactors of Experiment 2. (a) low concentration (b) high concentration

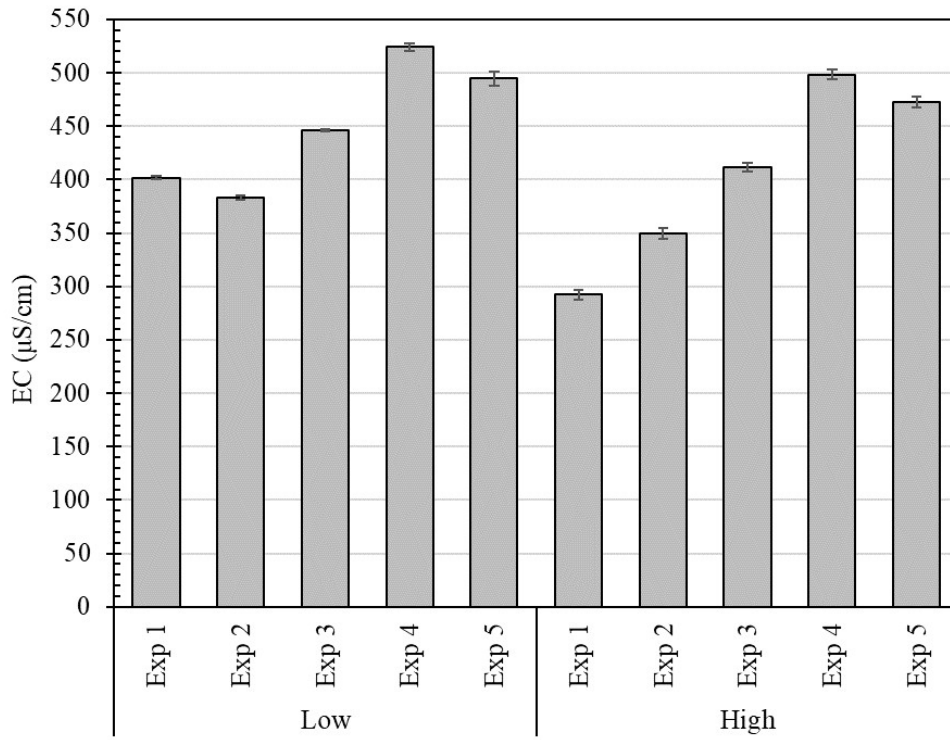

Figure S6: Mean electrical conductivity (EC) during experiments

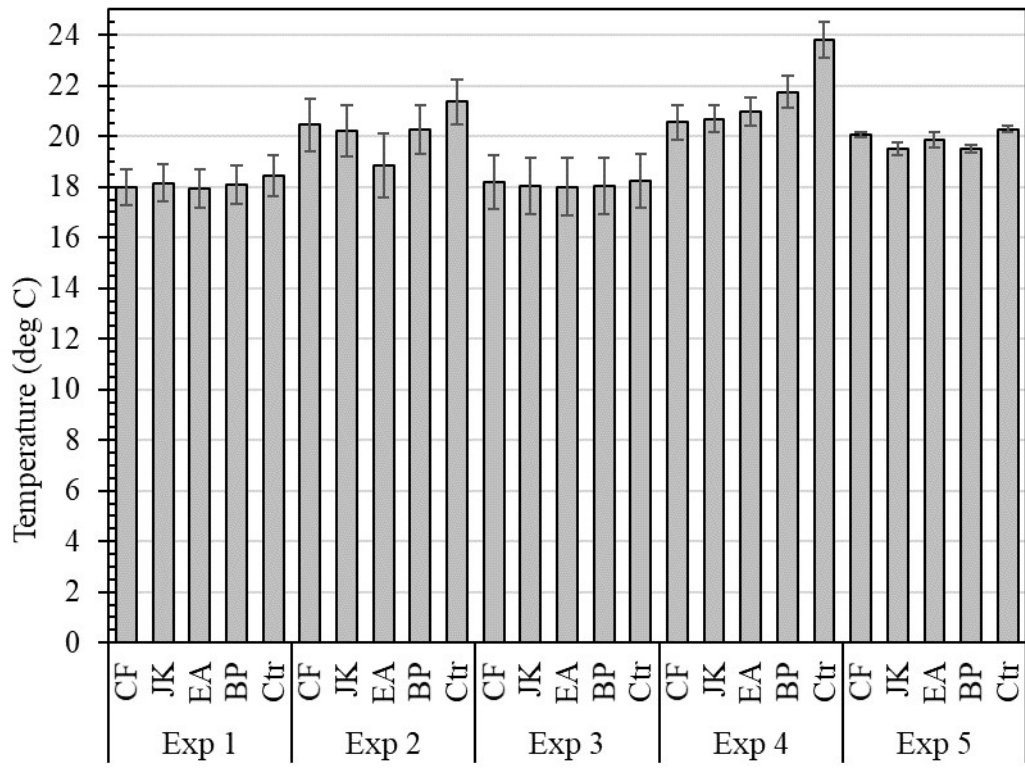

Figure S7: Mean water temperature during Experiment 2

*Carex fascicularis*

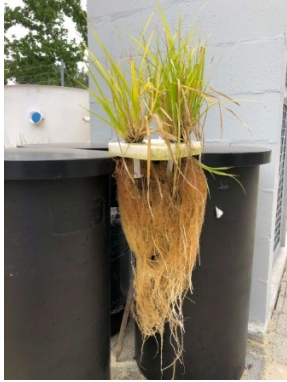

*Juncus kraussii*

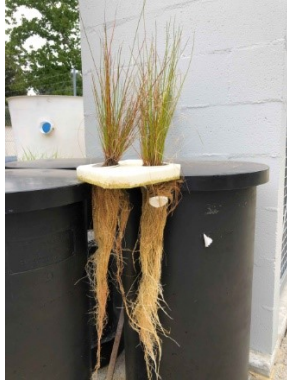

*Eleocharis acuta*

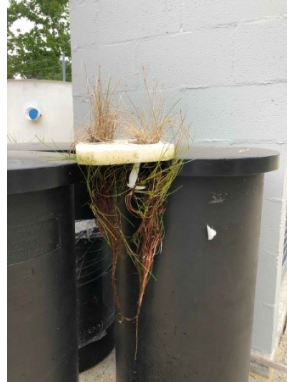

*Baumea preissii*

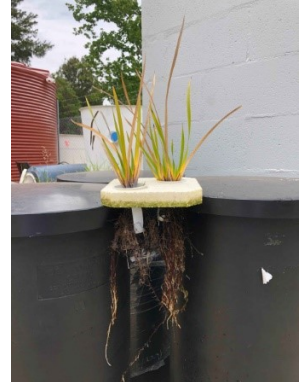

Plants grown at low nutrient concentration

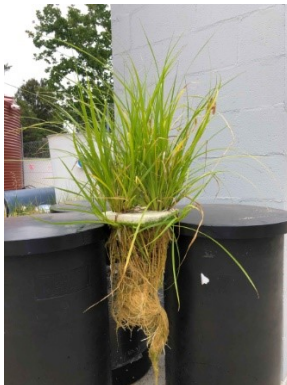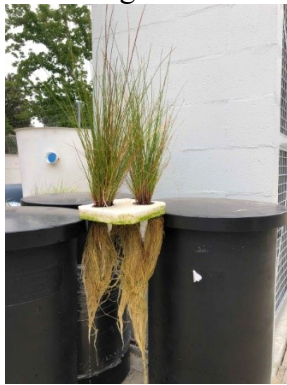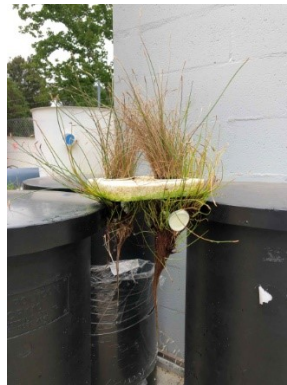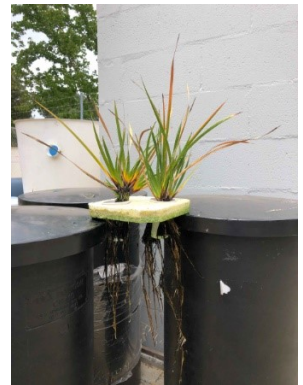

Plants grown at high nutrient concentration

Figure S8: Plant growth at the end of Experiment 2



Table S1: Linear regression results for the developed relationships

| Parameter | Plant                  | Equation         | p value | R <sup>2</sup> | F value |
|-----------|------------------------|------------------|---------|----------------|---------|
| TN        | <i>C. fascicularis</i> | 23.42x - 0.005   | 0.008   | 0.93           | 39.7    |
|           | <i>J. kraussii</i>     | 8.451 + 0.005    | 0.002   | 0.97           | 106.2   |
|           | <i>E. acuta</i>        | 10.812 + 0.0104  | 0.016   | 0.89           | 24.0    |
|           | <i>B. preissii</i>     | 7.42x + 0.005    | 0.024   | 0.87           | 18.2    |
| TP        | <i>C. fascicularis</i> | 11.366x - 0.013  | 0.059*  | 0.75           | 8.8     |
|           | <i>J. kraussii</i>     | 4.4988 + 0.0101  | 0.017   | 0.89           | 23.5    |
|           | <i>E. acuta</i>        | 10.266x + 0.0117 | 0.014   | 0.90           | 26.7    |
|           | <i>B. preissii</i>     | 2.8021x + 0.0132 | 0.112*  | 0.62           | 5.0     |

$$x = \frac{D_T}{V_W}$$

\* insignificant p values (p > 0.05)

## Calculation of expected transpiration related uptake

Volume of transpiration = Volume of evapotranspiration - Volume of evaporation

Expected mass removal through transpiration = Volume of transpiration × Initial concentration

Net observed uptake by plants = Total observed mass removal - Mass removal in control reactors

Table S2: Estimation of transpiration related uptake vs observed net plant uptake

| Parameter                                                                  | TN          |             |             |             |            |             |             |             | TP         |             |            |             |             |             |            |             |
|----------------------------------------------------------------------------|-------------|-------------|-------------|-------------|------------|-------------|-------------|-------------|------------|-------------|------------|-------------|-------------|-------------|------------|-------------|
|                                                                            | High        |             |             |             | Low        |             |             |             | High       |             |            |             | Low         |             |            |             |
| Plant                                                                      | <i>CF</i>   | <i>JK</i>   | <i>EA</i>   | <i>BP</i>   | <i>CF</i>  | <i>JK</i>   | <i>EA</i>   | <i>BP</i>   | <i>CF</i>  | <i>JK</i>   | <i>EA</i>  | <i>BP</i>   | <i>CF</i>   | <i>JK</i>   | <i>EA</i>  | <i>BP</i>   |
| Volume of water (L)                                                        | 18          | 18          | 18          | 18          | 18         | 18          | 18          | 18          | 18         | 18          | 18         | 18          | 18          | 18          | 18         | 18          |
| Volume of evapotranspiration (L)                                           | 2.3         | 2           | 1.6         | 1.7         | 2.3        | 2           | 1.6         | 1.7         | 2.3        | 2           | 1.6        | 1.7         | 2.3         | 2           | 1.6        | 1.7         |
| Volume of evaporation (L)                                                  | 1.5         | 1.5         | 1.5         | 1.5         | 1.5        | 1.5         | 1.5         | 1.5         | 1.5        | 1.5         | 1.5        | 1.5         | 1.5         | 1.5         | 1.5        | 1.5         |
| Volume of transpiration (L)                                                | 0.8         | 0.5         | 0.1         | 0.2         | 0.8        | 0.5         | 0.1         | 0.2         | 0.8        | 0.5         | 0.1        | 0.2         | 0.8         | 0.5         | 0.1        | 0.2         |
| Expected mass removal through transpiration (mg)                           | 11.0        | 6.9         | 1.4         | 2.8         | 1.8        | 1.1         | 0.2         | 0.5         | 2.8        | 1.8         | 0.4        | 0.7         | 0.4         | 0.2         | 0.0        | 0.1         |
| Initial Concentration (mg/L)                                               | 13.8        | 13.8        | 13.8        | 13.8        | 2.3        | 2.3         | 2.3         | 2.3         | 3.5        | 3.5         | 3.5        | 3.5         | 0.4         | 0.4         | 0.4        | 0.4         |
| Remaining Concentration after 4.6 days (mg/L)                              | 0.57        | 4.23        | 6.74        | 7.94        | 0.08       | 0.02        | 0.06        | 0.08        | 1.01       | 1.28        | 2.25       | 1.77        | 0.01        | 0.02        | 0.06       | 0.05        |
| Total observed mass removal (mg)                                           | 238         | 172         | 127         | 106         | 39         | 40          | 40          | 39          | 45         | 40          | 23         | 31          | 8           | 8           | 7          | 7           |
| Concentration in control reactor (mg/L)                                    | 11.8        | 11.8        | 11.8        | 11.8        | 1.07       | 1.07        | 1.07        | 1.07        | 2.3        | 2.3         | 2.3        | 2.3         | 0.35        | 0.35        | 0.35       | 0.35        |
| Mass removal in control reactors (mg)                                      | 36.1        | 36.1        | 36.1        | 36.1        | 21.4       | 21.4        | 21.4        | 21.4        | 21.6       | 21.6        | 21.6       | 21.6        | 1.6         | 1.6         | 1.6        | 1.6         |
| Net observed uptake by plants (mg)                                         | 202         | 136         | 91          | 69          | 18         | 19          | 18          | 18          | 23         | 18          | 0.90       | 10          | 6           | 6           | 5          | 5           |
| <b>Fold change of observed removal vs transpirational (passive) uptake</b> | <b>18.3</b> | <b>19.7</b> | <b>66.0</b> | <b>25.2</b> | <b>9.9</b> | <b>16.7</b> | <b>80.4</b> | <b>39.4</b> | <b>8.3</b> | <b>10.5</b> | <b>2.6</b> | <b>13.6</b> | <b>17.4</b> | <b>27.0</b> | <b>119</b> | <b>61.4</b> |
